# Supplementary material for: Fullerene-free organic photovoltaics based on unconventional material combination: a molecular donor and polymeric acceptors
Source: Royal Society of Chemistry journal article supplement (doi:10.1039/c5ta06612c), 2015-01-01
Supplement: c5ta06612c1.pdf [file c5ta06612c1.pdf]

## Supporting Information

# Fullerene-Free Organic Photovoltaics Based on Unconventional Material Combination: Molecular Donor and Polymeric Acceptor

Yanfang Geng<sup>†a</sup>, Bo Xiao<sup>†a</sup>, Seiichiro Izawa<sup>b</sup>, Jianming Huang<sup>b</sup>, Keisuke Tajima<sup>\*b</sup>, Qingdao Zeng<sup>a</sup>, Erjun Zhou<sup>\*a</sup>

**Table S1.** Device characteristics of OPV fabricated from p-DTS(FBTTh<sub>2</sub>)<sub>2</sub> blending with three n-type polymers with different D/A molar ratio.

| Active layer    |                         |                      | $V_{OC}$<br>(V) | $J_{SC}$<br>(mA cm <sup>-2</sup> ) | FF          | PCE          |
|-----------------|-------------------------|----------------------|-----------------|------------------------------------|-------------|--------------|
| n-type polymers | Solvent<br>CB/DIO (v/v) | D-A ratio<br>(wt/wt) |                 |                                    |             |              |
| PC-PDI          | 99.5/0.5                | 8:2                  | 0.74            | 3.85                               | 0.41        | 1.18%        |
|                 | 99.5/0.5                | <b>7:3</b>           | <b>0.80</b>     | <b>6.73</b>                        | <b>0.46</b> | <b>2.45%</b> |
|                 | 99.5/0.5                | 6:4                  | 0.80            | 6.27                               | 0.40        | 2.00%        |
|                 | 99.7/0.3                | 7:3                  | 0.82            | 5.84                               | 0.37        | 1.75%        |
|                 | 99/1                    | 7:3                  | 0.80            | 5.35                               | 0.45        | 1.94%        |
| PT-PDI          | 99.5/0.5                | 8:2                  | 0.68            | 4.61                               | 0.52        | 1.62%        |
|                 | 99.5/0.5                | <b>7:3</b>           | <b>0.66</b>     | <b>6.34</b>                        | <b>0.48</b> | <b>2.02%</b> |
|                 | 99.5/0.5                | 6:4                  | 0.66            | 5.85                               | 0.45        | 1.75%        |
|                 | 99.7/0.3                | 7:3                  | 0.66            | 5.79                               | 0.45        | 1.72%        |
|                 | 99/1                    | 7:3                  | 0.64            | 5.98                               | 0.43        | 1.65%        |
| PSe-PDI         | 99.5/0.5                | 9:1                  | 0.64            | 5.28                               | 0.44        | 1.48%        |
|                 | 99.5/0.5                | <b>8:2</b>           | <b>0.68</b>     | <b>7.59</b>                        | <b>0.58</b> | <b>3.01%</b> |
|                 | 99.5/0.5                | 7:3                  | 0.68            | 7.30                               | 0.54        | 2.69%        |
|                 | 99.5/0.5                | 6:4                  | 0.68            | 5.77                               | 0.56        | 2.19%        |
|                 | 99.5/0.5                | 5:5                  | 0.68            | 1.71                               | 0.55        | 0.64%        |
|                 | 99.7/0.3                | 8:2                  | 0.68            | 6.68                               | 0.57        | 2.60%        |
|                 | 99/1                    | 8:2                  | 0.64            | 6.23                               | 0.53        | 2.11%        |

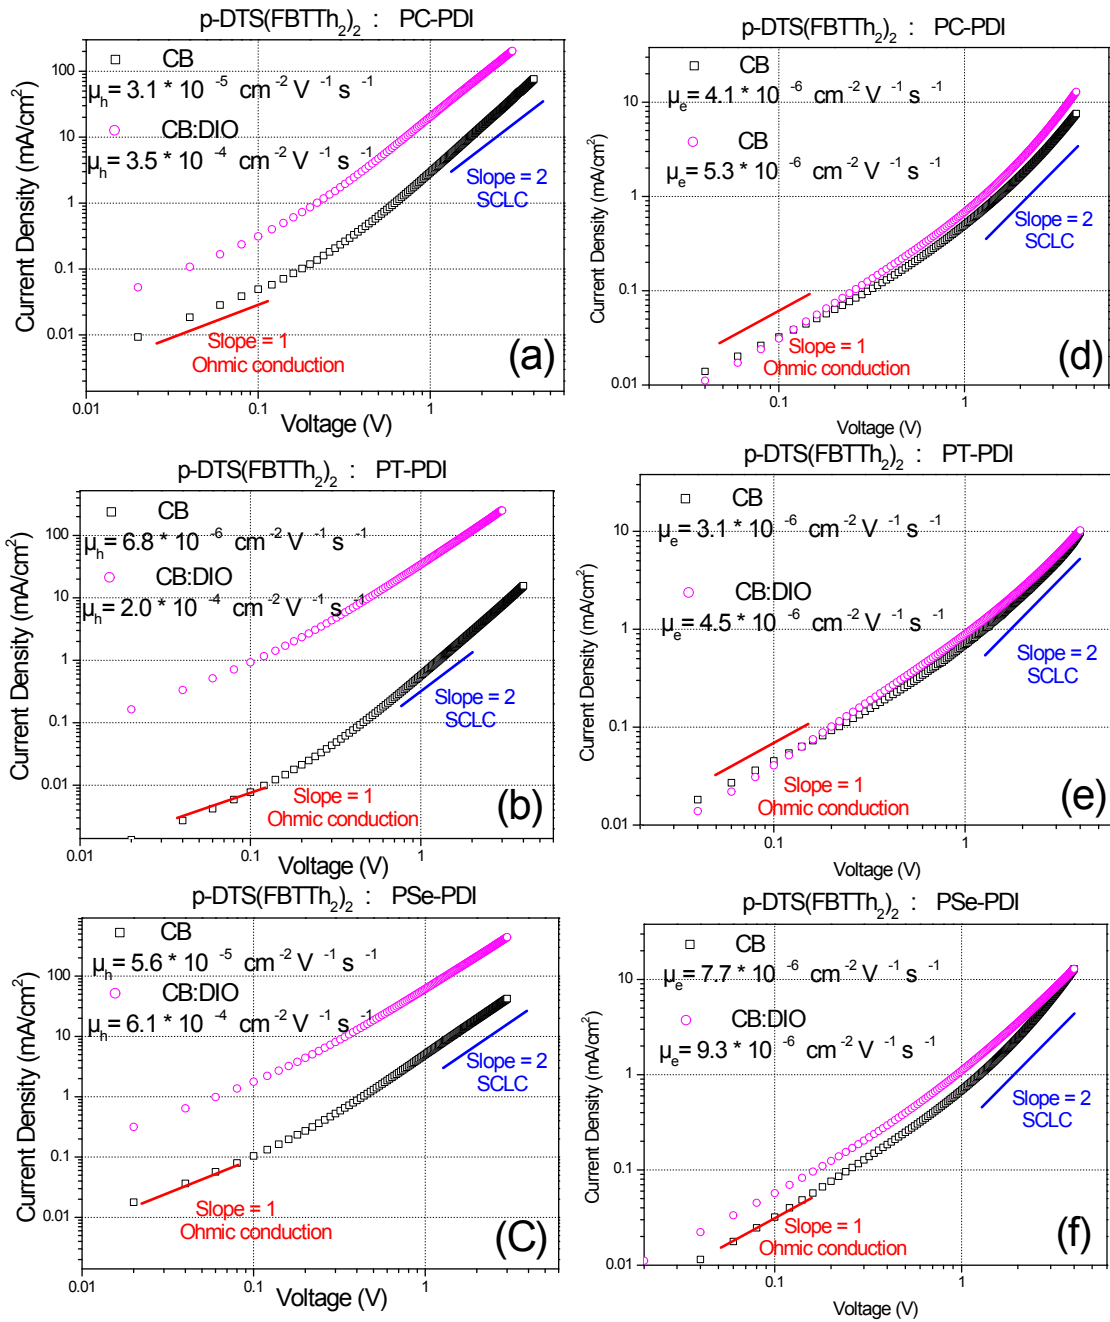

**Figure S1** Typical  $J-V$  curves based on p-DTS(FBTTh<sub>2</sub>)<sub>2</sub> : PX-PDI composite films for (a, b, c) the hole-only and (d, e, f) the electron-only devices spin-coated from different solvents, CB or CB:DIO (99.5:0.5 v/v).

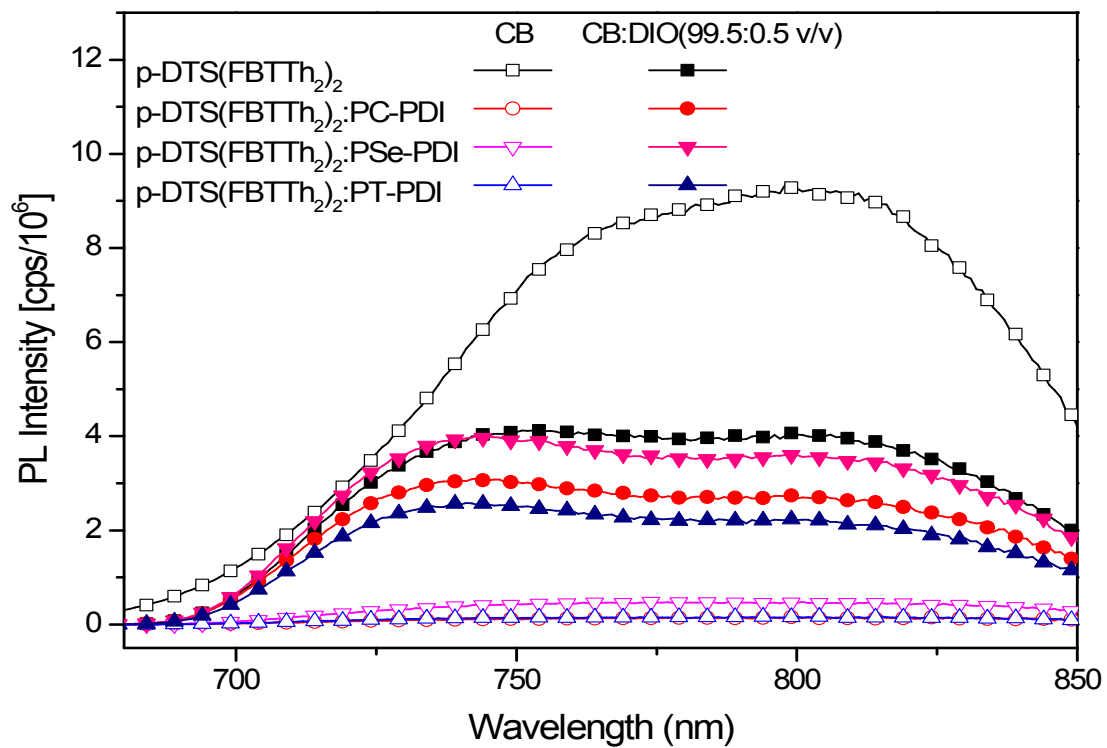

**Figure S2.** Photoluminescence spectra of pristine  $\text{p-DTS}(\text{FBTTh}_2)_2$  and  $\text{p-DTS}(\text{FBTTh}_2)_2$  : PX-PDI blend films spin-coated from CB and CB:DIO (0.5vol%) excited at 610 nm.
